# Supplementary material
Source: publisher figshare collection journal article supplement (https://karger.figshare.com/ndownloader/files/33157859)
Supplement: Supplementary file 1 [file 33157859]

Figure Legends

Supplementary Fig. 1. List of inclusion and exclusion criteria

Supplementary Fig. 2. Design of phase IV Adinox® clinical trial. *Adinox®, aspirin 25mg + extended-release dipyridamole 200mg

Supplementary Fig. 3. Trial profile
